# Supplementary material for: Causal neural mechanisms of context-based object recognition
Source: eLife. 2021 Aug 10;10:e69736. doi: 10.7554/eLife.69736 (PMC8354632; doi:10.7554/eLife.69736)
Supplement: Figure 3—source data 1. [file elife-69736-fig3-data1.xlsx]

## Sheet: Percentage correct
Figure 3 Source Data. This table contains the accuracy values for each participant (N=24) of each of three experiments (OPA, LOC, EVC). The conditions and TMS times are indicated in the table. The average values are plotted in Figure 3.
OPA	60-100 ms		160-200 ms		260-300 ms				60-100 ms	160-200 ms	260-300 ms
	Isolated object	Context based	Isolated object	Context based	Isolated object	Context based			Scene alone	Scene alone	Scene alone
1	75	90.625	78.125	85.9375	75	92.1875		1	45.3125	39.0625	42.1875
2	82.8125	79.6875	78.125	78.125	82.8125	78.125		2	39.0625	32.8125	34.375
3	75	79.6875	75	78.125	81.25	78.125		3	46.875	45.3125	50
4	79.6875	81.25	79.6875	79.6875	79.6875	82.8125		4	40.625	45.3125	45.3125
5	70.3125	75	70.3125	65.625	68.75	81.25		5	37.5	32.8125	37.5
6	75	71.875	75	65.625	73.4375	73.4375		6	48.4375	46.875	50
7	75	84.375	73.4375	78.125	75	82.8125		7	42.1875	34.375	43.75
8	76.5625	76.5625	81.25	75	78.125	76.5625		8	39.0625	34.375	40.625
9	84.375	81.25	87.5	79.6875	85.9375	85.9375		9	54.6875	54.6875	65.625
10	71.875	73.4375	73.4375	60.9375	75	65.625		10	45.3125	43.75	43.75
11	75	76.5625	75	75	75	78.125		11	50	48.4375	48.4375
12	71.875	90.625	75	85.9375	76.5625	87.5		12	32.8125	35.9375	35.9375
13	78.125	82.8125	73.4375	81.25	75	84.375		13	42.1875	35.9375	35.9375
14	78.125	82.8125	78.125	81.25	73.4375	84.375		14	35.9375	29.6875	31.25
15	73.4375	75	81.25	71.875	78.125	73.4375		15	46.875	45.3125	51.5625
16	76.5625	85.9375	75	75	78.125	85.9375		16	56.25	51.5625	56.25
17	60.9375	73.4375	62.5	67.1875	65.625	70.3125		17	37.5	39.0625	48.4375
18	78.125	73.4375	76.5625	68.75	78.125	70.3125		18	54.6875	53.125	56.25
19	75	78.125	78.125	78.125	79.6875	79.6875		19	42.1875	43.75	45.3125
20	78.125	76.5625	76.5625	70.3125	82.8125	75		20	46.875	51.5625	43.75
21	76.5625	85.9375	71.875	75	76.5625	78.125		21	56.25	64.0625	59.375
22	89.0625	82.8125	84.375	79.6875	81.25	81.25		22	53.125	50	56.25
23	76.5625	68.75	76.5625	70.3125	67.1875	76.5625		23	31.25	34.375	32.8125
24	79.6875	75	78.125	75	76.5625	75		24	51.5625	51.5625	53.125
average	76.3672	79.2318	76.4323	75.0651	76.6276	79.0365		average	44.8568	43.4896	46.1589
stdev	5.25974	5.76367	4.87437	6.42551	4.84296	6.18026		stdev	7.35017	8.71386	9.00515
SEM	1.07364	1.1765	0.994977	1.3116	0.988566	1.26154		SEM	1.50035	1.77871	1.83817
LOC	60-100 ms		160-200 ms		260-300 ms				60-100 ms	160-200 ms	260-300 ms
	Isolated object	Context based	Isolated object	Context based	Isolated object	Context based			Scene alone	Scene alone	Scene alone
1	79.6875	78.125	73.4375	70.3125	78.125	73.4375		1	50	48.4375	56.25
2	67.1875	71.875	64.0625	73.4375	71.875	64.0625		2	37.5	34.375	34.375
3	68.75	79.6875	71.875	84.375	75	82.8125		3	32.8125	34.375	40.625
4	82.8125	85.9375	78.125	81.25	82.8125	82.8125		4	39.0625	40.625	32.8125
5	78.125	75	75	70.3125	75	73.4375		5	32.8125	37.5	37.5
6	78.125	81.25	75	78.125	82.8125	75		6	51.5625	53.125	54.6875
7	73.4375	84.375	68.75	73.4375	70.3125	75		7	45.3125	42.1875	40.625
8	75	75	79.6875	68.75	81.25	71.875		8	46.875	50	48.4375
9	70.3125	70.3125	70.3125	70.3125	67.1875	70.3125		9	54.6875	51.5625	48.4375
10	82.8125	81.25	76.5625	84.375	78.125	78.125		10	40.625	42.1875	40.625
11	82.8125	81.25	78.125	76.5625	81.25	82.8125		11	32.8125	32.8125	42.1875
12	84.375	85.9375	78.125	85.9375	82.8125	81.25		12	39.0625	45.3125	28.125
13	78.125	79.6875	73.4375	82.8125	75	84.375		13	43.75	40.625	39.0625
14	75	86.4865	65.625	68.9655	79.3103	64.2857		14	42.1053	50	40.625
15	75	85.9375	73.4375	85.9375	76.5625	81.25		15	37.5	34.375	39.0625
16	82.8125	70.3125	85.9375	71.875	89.0625	67.1875		16	54.6875	57.8125	57.8125
17	89.0625	76.5625	87.5	75	90.625	75		17	42.1875	51.5625	45.3125
18	76.5625	71.875	67.1875	62.5	70.3125	64.0625		18	48.4375	40.625	43.75
19	57.8125	65.625	51.5625	65.625	57.8125	57.8125		19	35.9375	34.375	29.6875
20	76.5625	81.25	73.4375	82.8125	79.6875	78.125		20	56.25	56.25	56.25
21	87.5	71.875	87.5	70.3125	92.1875	67.1875		21	48.4375	46.875	53.125
22	76.5625	64.0625	70.3125	68.75	71.875	60.9375		22	50	50	53.125
23	75	76.5625	71.875	71.875	87.5	68.75		23	48.4375	42.1875	45.3125
24	81.25	76.5625	76.5625	76.5625	84.375	75		24	57.8125	53.125	53.125
average	77.2786	77.3666	73.8932	75.009	78.3697	73.1213		average	44.5278	44.5964	44.2057
stdev	6.84931	6.40089	7.77135	6.79451	7.94712	7.60124		stdev	7.66962	7.61265	8.62586
SEM	1.39811	1.30658	1.58632	1.38692	1.6222	1.5516		SEM	1.56555	1.55393	1.76075
EVC	60-100 ms		160-200 ms		260-300 ms				60-100 ms	160-200 ms	260-300 ms
	Isolated object	Context based	Isolated object	Context based	Isolated object	Context based			Scene alone	Scene alone	Scene alone
1	71.9298	67.3469	70.3704	72.9167	81.9672	72.7273		1	60.3774	49.0196	49.0196
2	81.25	60.9375	67.1875	68.75	81.25	64.0625		2	50	46.875	50
3	73.4375	82.8125	76.5625	87.5	81.25	85.9375		3	42.1875	45.3125	40.625
4	67.1875	68.75	71.875	78.125	82.8125	71.875		4	57.8125	53.125	59.375
5	59.375	71.875	60.9375	76.5625	73.4375	79.6875		5	31.25	35.9375	29.6875
6	79.6875	78.125	78.125	81.25	79.6875	84.375		6	34.375	35.9375	32.8125
7	71.875	81.25	71.875	79.6875	70.3125	84.375		7	39.0625	35.9375	34.375
8	65.625	70.3125	54.6875	75	67.1875	70.3125		8	35.9375	37.5	34.375
9	73.4375	84.375	70.3125	85.9375	75	85.9375		9	45.3125	34.375	45.3125
10	65.625	75	68.75	85.9375	75	82.8125		10	32.8125	32.8125	32.8125
11	73.4375	78.125	76.5625	84.375	79.6875	81.25		11	34.375	37.5	37.5
12	71.875	71.875	70.3125	79.6875	70.3125	73.4375		12	43.75	51.5625	48.4375
13	79.3103	67.3469	70.3704	77.0833	73.7705	63.6364		13	54.717	50.9434	51.9231
14	79.6875	73.4375	79.6875	73.4375	78.125	71.875		14	57.8125	56.25	56.25
15	67.1875	76.5625	68.75	78.125	76.5625	79.6875		15	39.0625	31.25	26.5625
16	70.3125	75	70.3125	82.8125	78.125	85.9375		16	32.8125	35.9375	39.0625
17	81.25	79.6875	84.375	78.125	87.5	82.8125		17	42.1875	48.4375	45.3125
18	71.875	81.25	73.4375	82.8125	76.5625	87.5		18	40.625	40.625	35.9375
19	82.8125	76.5625	81.25	78.125	85.9375	78.125		19	45.3125	43.75	50
20	78.125	84.375	75	87.5	79.6875	89.0625		20	42.1875	48.4375	46.875
21	59.375	64.0625	60.9375	67.1875	64.0625	70.3125		21	25	28.125	23.4375
22	76.5625	59.375	78.125	75	79.6875	71.875		22	45.3125	48.4375	42.1875
23	78.125	81.25	76.5625	81.25	75	82.8125		23	35.9375	32.8125	34.375
24	85.9375	73.4375	82.8125	84.375	84.375	79.6875		24	42.1875	43.75	46.875
average	73.5543	74.2971	72.4658	79.2318	77.3875	78.3381		average	42.1003	41.8604	41.3804
stdev	7.06269	7.0792	7.1039	5.49551	5.73143	7.36829		stdev	9.0451	7.90348	9.38936
SEM	1.44167	1.44504	1.45008	1.12177	1.16992	1.50405		SEM	1.84632	1.61329	1.9166

## Sheet: Reaction time
Figure 3 Source Data. This table contains the RT values for each participant (N=24) of each of three experiments (OPA, LOC, EVC). The conditions and TMS times are indicated in the table.
OPA	60-100 ms		160-200 ms		260-300 ms				60-100 ms	160-200 ms	260-300 ms
	Isolated object	Context based	Isolated object	Context based	Isolated object	Context based			Scene alone	Scene alone	Scene alone
1	1225.45	1441.55	1258.48	1172.51	1313.2	1142		1	1366.25	1455.21	1420.27
2	1612.47	1711.64	1708.64	1674.02	1711.73	1625.73		2	2571.33	2603.05	2370.3
3	1438.73	1699.51	1500.45	1563.29	1437.95	1736.5		3	1987.2	2056.95	2056.59
4	1530.18	1524.76	1342.87	1422.33	1555.91	1600.53		4	1672.49	1811.62	1900.83
5	816.996	933.289	735.334	781.429	752.331	796.627		5	883.255	949.289	861.483
6	1438.15	1508.06	1376.26	1516.73	1462.53	1473.48		6	1500.6	1571.26	1651.35
7	1014.38	1063.38	1120.87	995.276	1098.72	1062.92		7	1362.82	1347.43	1350.6
8	1279.56	1207.55	1188.97	1235.65	1298.24	1253.85		8	1623.91	1538.76	1677.03
9	1269.94	1335.86	1277.98	1417.45	1331.59	1419.57		9	1544	1601.35	1691.73
10	1321.83	1518.2	1348.83	1472.83	1328.69	1407.68		10	1722.38	1804.56	2003.33
11	1227.9	1214.34	1144.97	1319.46	1169.74	1295.78		11	1609.08	1703.62	1760.98
12	1465.16	1231.26	1398.3	1212.08	1384.97	1253.85		12	1404.74	1466.56	1493.53
13	1751.39	1916.79	1637.8	1853.65	1739.71	1706.29		13	2619.24	2307.76	2619.16
14	1770.02	1777.68	1696.97	1648.61	1726.44	1686.48		14	2291.36	2066.6	1963.14
15	880.384	895.941	808.083	995.763	817.055	897.929		15	878.487	964.336	1015.31
16	1261.77	1352.09	1248.72	1503.97	1213.57	1377.67		16	1581.29	1433.61	1611.88
17	1532.33	1472.61	1529.31	1579.02	1680.91	1632.02		17	1638.05	1717.72	2004.68
18	1691.99	1803.24	1653.47	1701.42	1677.19	1743.55		18	1963.76	2095.77	1985.37
19	1045.85	1157.79	1042.92	1071.52	1120.28	1184.15		19	1329.1	1231.41	1425.8
20	2017.05	1705.57	1849.41	2173.53	1636.85	1792.7		20	1750.8	1832.75	1901.62
21	1406.23	1441.18	1115.93	1516.06	1402.36	1450.24		21	1607.81	1665.11	1812.26
22	1549	1722.32	1684.23	1535.96	1574.5	1508.21		22	2031.3	2013.7	1992.83
23	1404.9	1559.95	1341.09	1374.03	1481.52	1451.16		23	1759.92	1641.17	1688.47
24	1603.25	1760	1626.4	1761.71	1575.84	1846.07		24	1608.44	1736.76	1834.02
average	1398.12	1456.44	1359.85	1437.43	1395.49	1431.04		average	1679.48	1692.35	1753.86
stdev	285.706	282.482	286.048	308.523	269.633	279.898		stdev	423.126	386.4	383.868
SEM	58.3194	57.6614	58.3893	62.9771	55.0386	57.1339		SEM	86.3702	78.8736	78.3567
LOC	60-100 ms		160-200 ms		260-300 ms				60-100 ms	160-200 ms	260-300 ms
	Isolated object	Context based	Isolated object	Context based	Isolated object	Context based			Scene alone	Scene alone	Scene alone
1	1304.84	1366.76	1205.66	1471.3	1244.39	1416.52		1	1338.11	1568.97	1731.22
2	1721.47	1735.37	1692.93	1729.72	1628.64	1796.68		2	2009.06	2008.41	2005.3
3	990.547	1205.27	986.481	1192.01	1029.06	1110.91		3	1331.97	1290.01	1204.9
4	1746.07	1806.6	1679.9	1708.3	1713.97	1669.82		4	2245.01	2329.75	2244.81
5	1055.6	1127.69	1031.01	1152.7	1043.04	1103.89		5	1282.24	1176.43	1250.64
6	1023.74	1086.43	1006.47	1018.09	1046.19	1093.25		6	1093.65	1150.18	1287.69
7	1081.63	1192.77	1082.72	1037.92	1208.09	1108.15		7	1400.46	1442.09	1455.16
8	1423.13	1468.97	1438.45	1408.49	1331.21	1497.31		8	1515.52	1657.87	1509
9	1657.53	1691.46	1600.56	1788.13	1548.69	2001.54		9	1893.53	2252.55	2198.69
10	1033.29	1107.47	1016.38	1039.02	1044.12	1073.4		10	1358.15	1398.77	1351.93
11	1231.22	1380.08	1253.08	1245.7	1244.48	1398.3		11	1471.77	1628.99	1575.13
12	1680.44	1596.95	1640.85	1553.84	1745.46	1612.68		12	2122.88	2017.08	2036.39
13	1532.63	1539.2	1609.87	1512.84	1580.53	1372.73		13	1844.01	1863.47	2092.81
14	1765.68	1591.59	1737.84	1544.47	1566.38	1723.12		14	2052.17	2141.07	2315.04
15	1387.06	1239.55	1375.95	1256.32	1277.07	1261.93		15	1781.7	1877.98	1884.25
16	1337.6	1525.68	1235.28	1385.15	1186.92	1481.02		16	1437.02	1540.73	1438.19
17	1114.68	1187.82	1245.05	1268.1	1151.97	1185.9		17	1489.38	1395.23	1593.7
18	1484.69	1654.09	1595.75	1716.35	1743.42	1911.41		18	1630.43	1796.92	1891.01
19	1460.95	1562.17	1387.17	1445.68	1403.62	1405.13		19	1766.44	1710.62	1738.02
20	1111.09	1279.51	1060.26	1330.33	1052.75	1244.32		20	1424.94	1477.68	1728.09
21	1173.43	1465.59	1246.17	1506.8	1198.81	1449.2		21	1321.36	1408.04	1557.49
22	2057.14	2276.11	2098.1	2299.16	2103.32	2500.86		22	2209.04	2631.31	2537.64
23	1811.67	1653.21	1679.29	1606	1855.85	1676.67		23	1842.89	1834.98	1978
24	1037.28	1178.81	1101.21	1209.22	1033.97	1186.91		24	1318.43	1333.98	1447.01
average	1384.31	1454.96	1375.27	1434.4	1374.25	1470.07		average	1632.51	1705.55	1752.17
stdev	307.816	280.305	299.31	292.511	307.935	347.978		stdev	330.953	382.07	366.302
SEM	62.8326	57.2171	61.0964	59.7085	62.857	71.0306		SEM	67.5555	77.9898	74.7711
EVC	60-100 ms		160-200 ms		260-300 ms				60-100 ms	160-200 ms	260-300 ms
	Isolated object	Context based	Isolated object	Context based	Isolated object	Context based			Scene alone	Scene alone	Scene alone
1	1457.47	1298.97	1491.47	1395.41	1435.93	1540.23		1	1434.94	1793.97	1782.98
2	1845.97	1462.43	1756.23	1611.72	1658.98	1443.13		2	1593.69	1633.24	1733.49
3	1506.63	1511.34	1607.22	1329.85	1478.78	1496.06		3	2047.68	1790.05	1904.03
4	1081.37	1115.22	972.318	1180.68	1013.99	1187.1		4	1280.16	1275.43	1480.49
5	1354.04	1428.14	1594.32	1291.61	1570.34	1493.18		5	1734.25	1771.58	2038.9
6	1307.21	1423.92	1238.49	1222.74	1239.36	1333.3		6	1679.02	1672.12	1657.17
7	993.923	973.492	1013.29	1024.27	1069.72	1056.08		7	1136.31	1157.73	1149.57
8	1443.7	1616.01	1520.5	1593.71	1600.85	1564.27		8	1606.14	1576.32	1669.46
9	1245.76	1379.32	1260.43	1244.98	1288.08	1211.75		9	1388.01	1500.84	1512.23
10	1188.28	1349.49	1197.08	1213.72	1220.75	1215.79		10	1385.2	1347.81	1367.34
11	1175.94	1248.19	1111.93	1167.48	1078.21	1280.29		11	1615.57	1437.2	1519.69
12	1549.98	1675.53	1546.47	1718.62	1688.81	1482.9		12	2196.15	1973.08	2009.01
13	1189.28	1390.71	1094.18	1331.1	1152.5	1292.63		13	1299.42	1461.66	1573.95
14	1201.69	1303.56	1043.36	1254.32	1195.2	1387.75		14	1372.68	1387.31	1405.23
15	1477.62	1653.8	1362.19	1390.86	1450.21	1480.31		15	1939.56	1857.94	1923.94
16	1460.02	1730.62	1412.14	1436.59	1362.82	1287.24		16	1806.04	1717.93	1853.22
17	1139.16	1272.67	1227.94	1293.93	1207.03	1282.69		17	1235.53	1331.13	1368.74
18	1315.5	1368.37	1345.3	1341.06	1360.39	1352.4		18	1569.41	1738.43	1614.36
19	1037.78	1082.64	992.218	1101.71	1046.88	1138.8		19	1121.03	1093.35	1116.58
20	978.75	1055.29	1049.55	1180.48	1116.75	986.711		20	1209.29	1205.36	1273.4
21	1093.8	1200.8	1110.79	1177.22	1202.77	988.027		21	1376.76	1253.92	1367.38
22	1669.9	1609.9	1375.32	1687.05	1611.2	1934.54		22	1563.81	1873.14	1792.26
23	1280.92	1277.09	1383.08	1360.86	1282.63	1168.77		23	1539.96	1416.43	1362.81
24	1505.86	1458.63	1476.22	1666.02	1548.37	1537.26		24	1573.46	1652.21	1766.96
average	1312.52	1370.26	1299.25	1342.33	1328.36	1339.22		average	1529.34	1538.26	1593.47
stdev	220.617	202.204	223.107	190.863	209.178	213.668		stdev	277.195	250.056	261.527
SEM	45.0333	41.2746	45.5416	38.9597	42.6983	43.6149		SEM	56.5821	51.0425	53.384
